# Supplementary material for: Not just a colourful metaphor: modelling the landscape of cellular development using Hopfield networks
Source: PubMed Central journal article supplement (PMC5516853; doi:10.1038/npjsba.2016.1), 2016-02-18
Supplement: npjsba20161-s2.pdf [file npjsba20161-s2.pdf]

Table S1: Additional datasets employed in this study.

| Study                                 | Dataset          | Summary                                                                                                                                                                                                                                                                                              | Platform                                                     | # of samples | Stages of differentiation/development | # of probes |
|---------------------------------------|------------------|------------------------------------------------------------------------------------------------------------------------------------------------------------------------------------------------------------------------------------------------------------------------------------------------------|--------------------------------------------------------------|--------------|---------------------------------------|-------------|
| DeLaForest <i>et al.</i> 2011         | GSE25417         | Hepatocyte differentiation of H9 ES cells (day 0) to definitive endoderm (day 5) and hepatic progenitor cells (day 10)                                                                                                                                                                               | [HG-U133_Plus_2] Affymetrix Human Genome U133 Plus 2.0 Array | 12           | Day 5 X 3                             | 54,675      |
|                                       |                  |                                                                                                                                                                                                                                                                                                      |                                                              |              | Day 10 X 3                            |             |
|                                       |                  |                                                                                                                                                                                                                                                                                                      |                                                              |              | Day 15 X 3                            |             |
|                                       |                  |                                                                                                                                                                                                                                                                                                      |                                                              |              | Day 20 X 3                            |             |
| Hailesellasse Sene <i>et al.</i> 2007 | GSE3749          | Mouse embryonic stem cell (mESC) differentiation<br>11-Point time-course study of differentiating mESC (J1 mESC lines)                                                                                                                                                                               | [MOE430A] Affymetrix Mouse Expression 430A Array             | 9            | 0 h X 3                               | 22,690      |
|                                       |                  |                                                                                                                                                                                                                                                                                                      |                                                              |              | 6 h X 3                               |             |
|                                       |                  |                                                                                                                                                                                                                                                                                                      |                                                              |              | 12 h X 3                              |             |
| Xie <i>et al.</i> 2010                | GSE18290 (Mouse) | Early embryo development<br>Mouse embryo expression data were generated at the one-, two-, four- and eight-cell stages, and at morula, and blastocyst                                                                                                                                                | [MOE430A] Affymetrix Mouse Expression 430A Array             | 18           | Stage 1 X 3                           | 22,690      |
|                                       |                  |                                                                                                                                                                                                                                                                                                      |                                                              |              | Stage 2 X 3                           |             |
|                                       |                  |                                                                                                                                                                                                                                                                                                      |                                                              |              | Stage 4 X 3                           |             |
|                                       |                  |                                                                                                                                                                                                                                                                                                      |                                                              |              | Stage 8 X 3                           |             |
|                                       |                  |                                                                                                                                                                                                                                                                                                      |                                                              |              | Morula X 3                            |             |
|                                       |                  |                                                                                                                                                                                                                                                                                                      |                                                              |              | Blastocyst X 3                        |             |
| Xie <i>et al.</i> 2010                | GSE18290 (Human) | Early embryo development<br>Human embryo expression data were generated at the one-, two-, four- and eight-cell stages, and at morula, and blastocyst                                                                                                                                                | [HG-U133_Plus_2] Affymetrix Human Genome U133 Plus 2.0 Array | 18           | Stage 1 X 3                           | 54,675      |
|                                       |                  |                                                                                                                                                                                                                                                                                                      |                                                              |              | Stage 2 X 3                           |             |
|                                       |                  |                                                                                                                                                                                                                                                                                                      |                                                              |              | Stage 4 X 3                           |             |
|                                       |                  |                                                                                                                                                                                                                                                                                                      |                                                              |              | Stage 8 X 3                           |             |
|                                       |                  |                                                                                                                                                                                                                                                                                                      |                                                              |              | Morula X 3                            |             |
|                                       |                  |                                                                                                                                                                                                                                                                                                      |                                                              |              | Blastocyst X 3                        |             |
| Fang <i>et al.</i> 2010               | GSE18887         | Early human organogenesis: Transcriptome profiles of human embryos at six successive developmental stages (Carnegie Stages 9 to 14)<br>Human post-implantation embryos were collected at six successive time periods: Carnegie Stages 9 to 14 (E20 to E32) covering the first third of organogenesis | [HG-U133A] Affymetrix Human Genome U133A Array               | 18           | E20 X 3                               | 22,283      |
|                                       |                  |                                                                                                                                                                                                                                                                                                      |                                                              |              | E22 X 3                               |             |
|                                       |                  |                                                                                                                                                                                                                                                                                                      |                                                              |              | E24 X 3                               |             |
|                                       |                  |                                                                                                                                                                                                                                                                                                      |                                                              |              | E26 X 3                               |             |
|                                       |                  |                                                                                                                                                                                                                                                                                                      |                                                              |              | E28 X 3                               |             |

|                               |          |                                                                                                                                                                       |                                                             |    |                 |        |
|-------------------------------|----------|-----------------------------------------------------------------------------------------------------------------------------------------------------------------------|-------------------------------------------------------------|----|-----------------|--------|
|                               |          |                                                                                                                                                                       |                                                             |    | E31 X 3         |        |
| Dong <i>et al.</i><br>2010    | GSE20954 | Mouse lung development<br>mRNA expression profile in mouse lung<br>development                                                                                        | [Mouse430_2]<br>Affymetrix Mouse<br>Genome 430 2.0<br>Array | 14 | Day 12 X 2      | 45,101 |
|                               |          |                                                                                                                                                                       |                                                             |    | Day 14 X 2      |        |
|                               |          |                                                                                                                                                                       |                                                             |    | Day 16 X 2      |        |
|                               |          |                                                                                                                                                                       |                                                             |    | Day 18 X 2      |        |
|                               |          |                                                                                                                                                                       |                                                             |    | Day p-day2 X 2  |        |
|                               |          |                                                                                                                                                                       |                                                             |    | Day p-day10 X 2 |        |
| Day p-day30 X 2               |          |                                                                                                                                                                       |                                                             |    |                 |        |
| Lachke <i>et al.</i><br>2012  | GSE32334 | Embryonic mouse ocular lens development                                                                                                                               | [Mouse430_2]<br>Affymetrix Mouse<br>Genome 430 2.0<br>Array | 9  | E10.5 X 3       | 45,101 |
|                               |          |                                                                                                                                                                       |                                                             |    | E11.5 X 3       |        |
|                               |          |                                                                                                                                                                       |                                                             |    | E12.5 X 3       |        |
| Muntean <i>et al.</i><br>2012 | GSE21299 | Bone marrow cells collected from 6-8 week<br>female mice were transduced with a Hoxa9<br>expressing retrovirus. Hoxa9-ER cells were<br>sampled at different intervals | [Mouse430_2]<br>Affymetrix Mouse<br>Genome 430 2.0<br>Array | 12 | Day 0 X 3       | 45,101 |
|                               |          |                                                                                                                                                                       |                                                             |    | Day 3 X 3       |        |
|                               |          |                                                                                                                                                                       |                                                             |    | Day 4 X 3       |        |
|                               |          |                                                                                                                                                                       |                                                             |    | Day 5 X 3       |        |
