# Supplementary material for: Not just a colourful metaphor: modelling the landscape of cellular development using Hopfield networks
Source: PubMed Central journal article supplement (PMC5516853; doi:10.1038/npjsba.2016.1), 2016-02-18
Supplement: npjsba20161-s4.pdf [file npjsba20161-s4.pdf]

Table S3: Overview of case studies. For each case study, the proportion of variance captured by principal components PC1 and PC2; energy scores for each time-point or group; number of feature-selected genes or probes; and number of probes or genes observed to switch expression at each transition.

| Case study       | PC1(%) | PC2(%) | Time-point (groups) | <i>E</i> | # selected probes | Transition           | # probes switched |
|------------------|--------|--------|---------------------|----------|-------------------|----------------------|-------------------|
| GSE13201         | 52.01  | 9.24   | P7                  | -1320897 | 3,753             | P7 to P4             | 3,405             |
|                  |        |        | P6                  | -755220  |                   | P5 to P4             | 1,861             |
|                  |        |        | P5                  | -599724  |                   | P6 to P4             | 3,430             |
|                  |        |        | P4                  | -3307223 |                   | P6 to P5             | 2,712             |
|                  |        |        |                     |          |                   | P7 to P5             | 2,810             |
|                  |        |        |                     |          |                   | P7 to P6             | 1,453             |
| GSE8091          | 71.56  | 22.21  | E9                  | -1690452 | 2,748             | E9 to E13            | 2,594             |
|                  |        |        | E11                 | -270148  |                   | E9 to E11            | 2,169             |
|                  |        |        | E13                 | -2024632 |                   | E11 to E13           | 2,430             |
| THP1-Mac         | 17.84  | 10.25  | 0h                  | -23.9821 | 45                | 0h to 96h            | 20                |
|                  |        |        | 1h                  | -10.0384 |                   | 0h to 1h             | 23                |
|                  |        |        | 6h                  | -7.54461 |                   | 0h to 6h             | 22                |
|                  |        |        | 96h                 | -22.1606 |                   | 1h to 6h             | 23                |
|                  |        |        |                     |          |                   | 1h to 96h            | 21                |
|                  |        |        |                     |          |                   | 1h to 6h             | 23                |
|                  |        |        |                     |          |                   | 6h to 96h            | 22                |
| GSE17708         | 29.28  | 11.57  | 0h                  | -401074  | 2,620             | 0h to 72h            | 1,974             |
|                  |        |        | 8h                  | -304722  |                   | 0h to 8h             | 1,511             |
|                  |        |        | 16h                 | -146059  |                   | 0h to 16h            | 2,013             |
|                  |        |        | 24h                 | -273684  |                   | 0h to 24h            | 2,021             |
|                  |        |        | 72h                 | -304852  |                   | 8h to 16h            | 1,806             |
|                  |        |        |                     |          |                   | 16h to 24h           | 1,606             |
|                  |        |        |                     |          |                   | 16h to 72h           | 1,737             |
|                  |        |        |                     |          |                   | 8h to 24h            | 1,936             |
|                  |        |        |                     |          |                   | 24h to 72h           | 1,478             |
|                  |        |        |                     |          |                   | 8h to 72h            | 1,960             |
| GSE25417         | 43.32  | 19.13  | Day 5               | -2569512 | 5,042             | Day 5 to Day 20      | 4000              |
|                  |        |        | Day 10              | -1742933 |                   |                      |                   |
|                  |        |        | Day 15              | -1542097 |                   |                      |                   |
|                  |        |        | Day 20              | -2720105 |                   |                      |                   |
| GSE3749          | 15.95  | 13.46  | 0 h                 | -201347  | 2,368             | 0h to 12 h           | 1704              |
|                  |        |        | 6 h                 | -190764  |                   |                      |                   |
|                  |        |        | 12 h                | -199198  |                   |                      |                   |
| GSE18290 (Mouse) | 53.9   | 25.64  | Stage 1             | -440921  | 1,827             | Stage1 to Blastocyst | 1,488             |
|                  |        |        | Stage 2             | -603086  |                   |                      |                   |
|                  |        |        | Stage 4             | -416632  |                   |                      |                   |
|                  |        |        | Stage 8             | -385209  |                   |                      |                   |
|                  |        |        | Morula              | -579501  |                   |                      |                   |
|                  |        |        | Blastocyst          | -389707  |                   |                      |                   |
| GSE18290         | 73.91  | 8.5    | Stage 1             | -6414379 | 4,684             |                      | 4,478             |

|          |       |       |             |          |       |                        |       |
|----------|-------|-------|-------------|----------|-------|------------------------|-------|
| (Human)  |       |       | Stage 2     | -6016848 |       | Stage1 to Blastocyst   |       |
|          |       |       | Stage 4     | -5081828 |       |                        |       |
|          |       |       | Stage 8     | -4612578 |       |                        |       |
|          |       |       | Morula      | -6507029 |       |                        |       |
|          |       |       | Blastocyst  | -6067749 |       |                        |       |
| GSE18887 | 58.69 | 15.79 | E20         | -222282  | 1,050 | E20 to E31             | 927   |
|          |       |       | E22         | -218827  |       |                        |       |
|          |       |       | E24         | -111771  |       |                        |       |
|          |       |       | E26         | -101452  |       |                        |       |
|          |       |       | E28         | -226820  |       |                        |       |
|          |       |       | E31         | -231239  |       |                        |       |
| GSE20954 | 79.61 | 8.66  | Day 12      | -936343  | 3,799 | Day 12 to Day p-Day 30 | 2,868 |
|          |       |       | Day 14      | -675155  |       |                        |       |
|          |       |       | Day 16      | -172117  |       |                        |       |
|          |       |       | Day 18      | -541078  |       |                        |       |
|          |       |       | Day p-day2  | -551912  |       |                        |       |
|          |       |       | Day p-day10 | -501771  |       |                        |       |
|          |       |       | Day p-day30 | -1508509 |       |                        |       |
| GSE32334 | 56.38 | 22.56 | E10.5       | -743351  | 2,060 | E10.5 to E12.5         | 1,602 |
|          |       |       | E11.5       | -341230  |       |                        |       |
|          |       |       | E12.5       | -722994  |       |                        |       |
| GSE21299 | 47.72 | 19.67 | Day 0       | -1034284 | 2,804 | Day 0 to Day 5         | 2,804 |
|          |       |       | Day 3       | -554739  |       |                        |       |
|          |       |       | Day 4       | -511360  |       |                        |       |
|          |       |       | Day 5       | -1152137 |       |                        |       |
